# Supplementary material
Source: MDPI journal article supplement (https://www.mdpi.com/2073-4352/6/5/57)

# Supplementary Materials: The Synthesis and Crystal Structure of Two New Hydrazone Compounds

Li-Hua Wang and Xi-Shi Tai

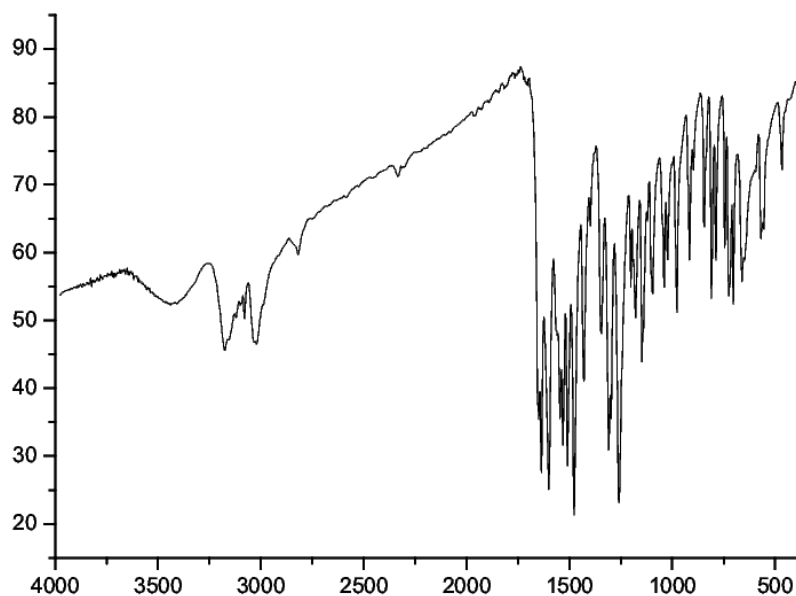

Figure S1. The IR spectrum of compound 1.

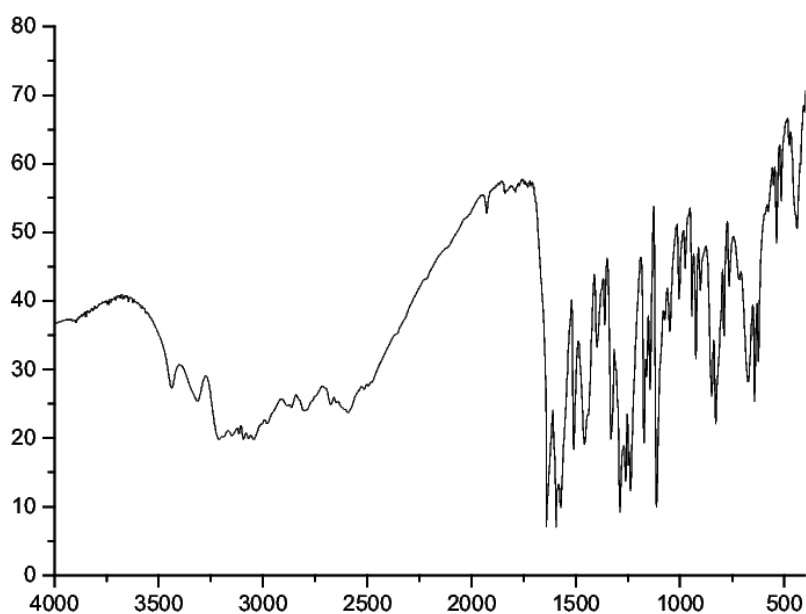

Figure S2. The IR spectrum of compound 2.

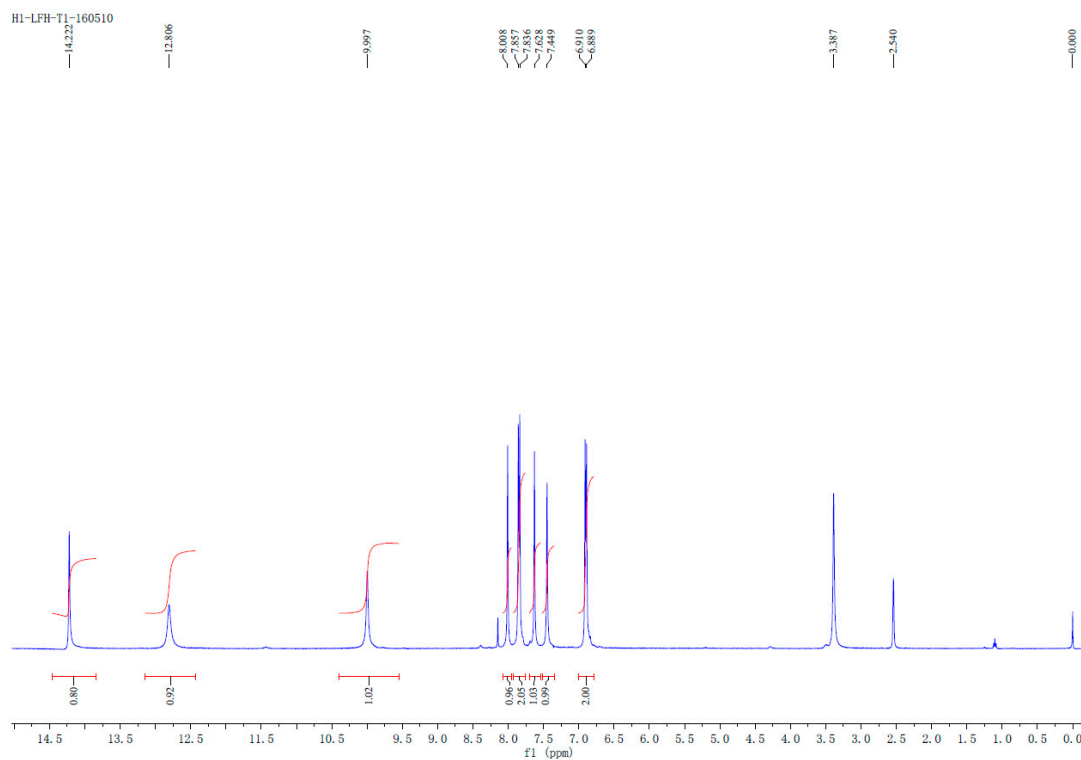Figure S3.  $^1\text{H}$ NMR spectrum of compound 1.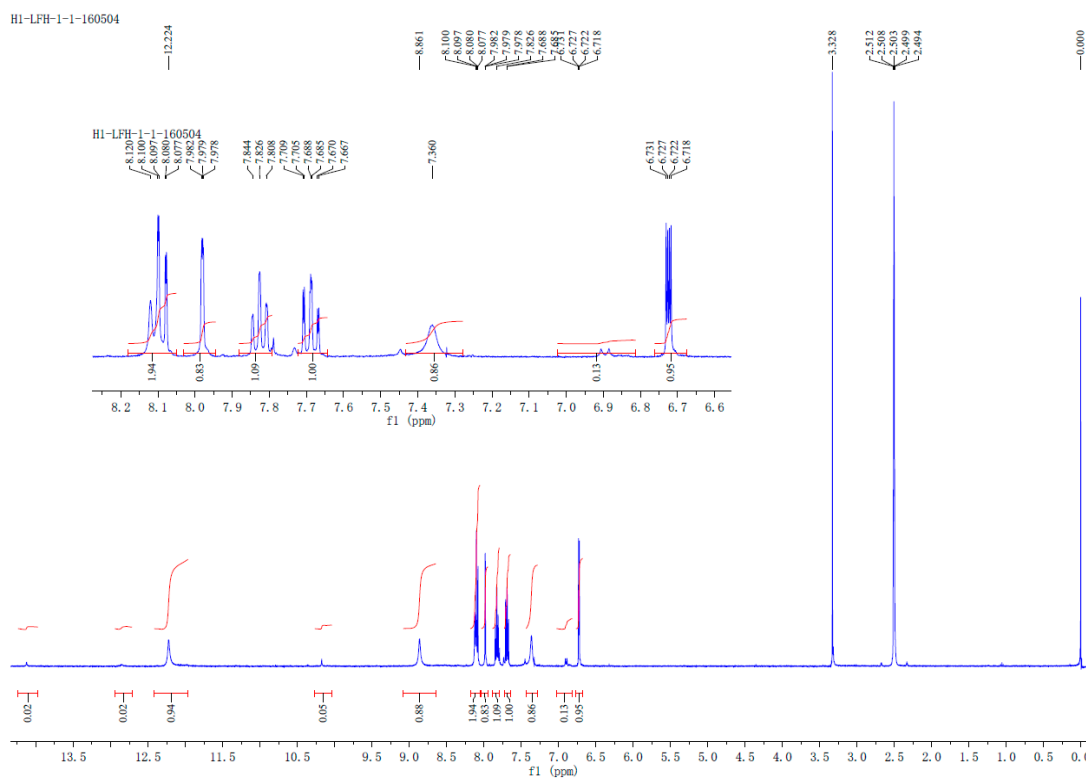Figure S4.  $^1\text{H}$ NMR spectrum of compound 2.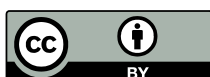

Supplement: s1 [file s1]
